# Supplementary material
Source: PubMed Central journal article supplement (PMC7507422)
Supplement: EMBR-21-e49898-s001.pdf [file EMBR-21-e49898-s001.pdf]

## APPENDIX CONTENTS

|                          |   |
|--------------------------|---|
| Appendix Figure S1 ..... | 2 |
| Appendix Figure S2 ..... | 3 |
| Appendix Figure S3 ..... | 4 |
| Appendix Figure S4 ..... | 5 |

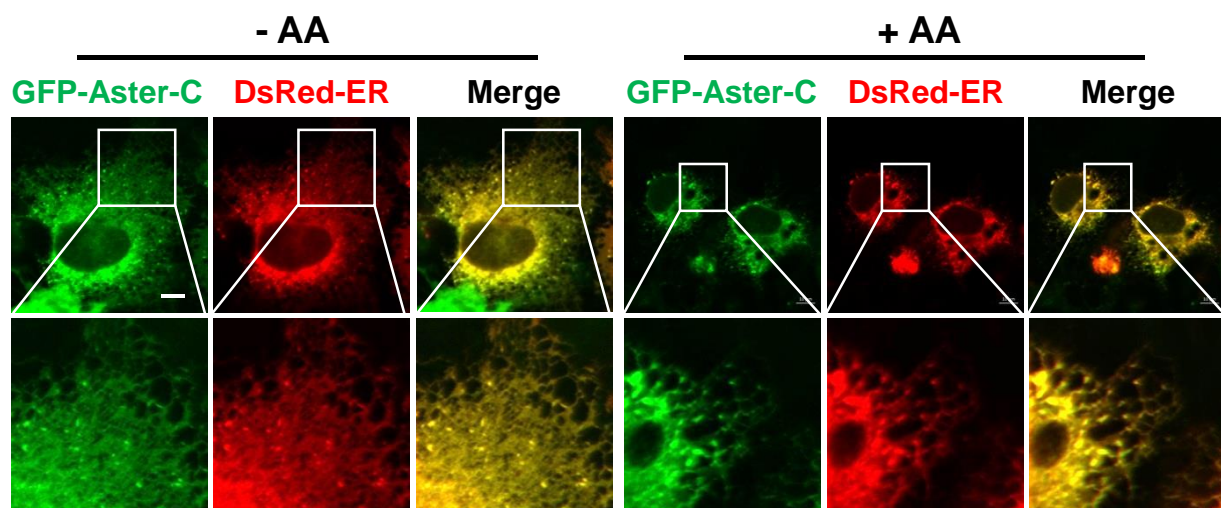

**Appendix Figure S1. Aster-C is an ER protein.** Confocal image analysis depicting the co-localization of Aster-C with ER in COS-7 cells transiently expressing GFP-Aster-C and DsRed-ER under starvation and in response to AA stimulation. Scale bar, 5  $\mu$ m.

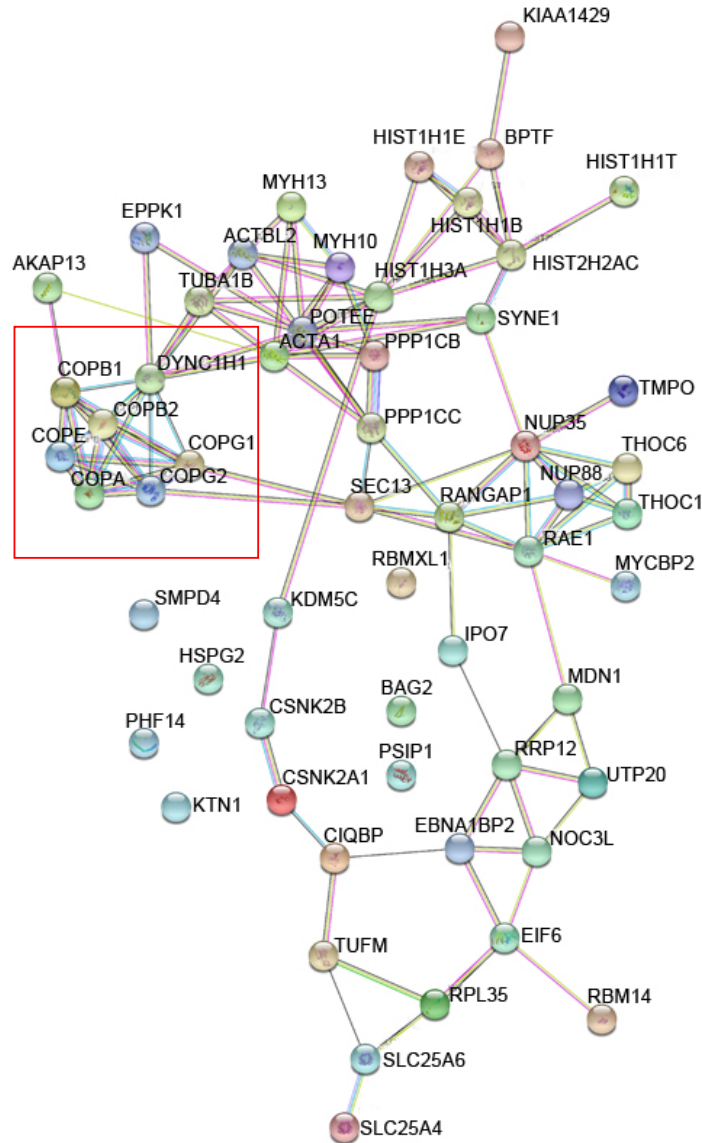

**Appendix Figure S2. Network of Aster-C interacting proteins.** Co-immunoprecipitation and protein mass spectrometry analysis demonstrate that Aster-C mainly interacts with three clusters of protein families, including coatmer protein complex I (COP I), myosin and cytoskeleton related proteins, and the nuclear pore complex (NPC), which resembles the SEA-complex in budding yeast which contains TORC1 and its upstream regulators of GATOR1 and GATOR2. The protein interaction network was generated using the STRING online tool (<https://string-db.org/>).

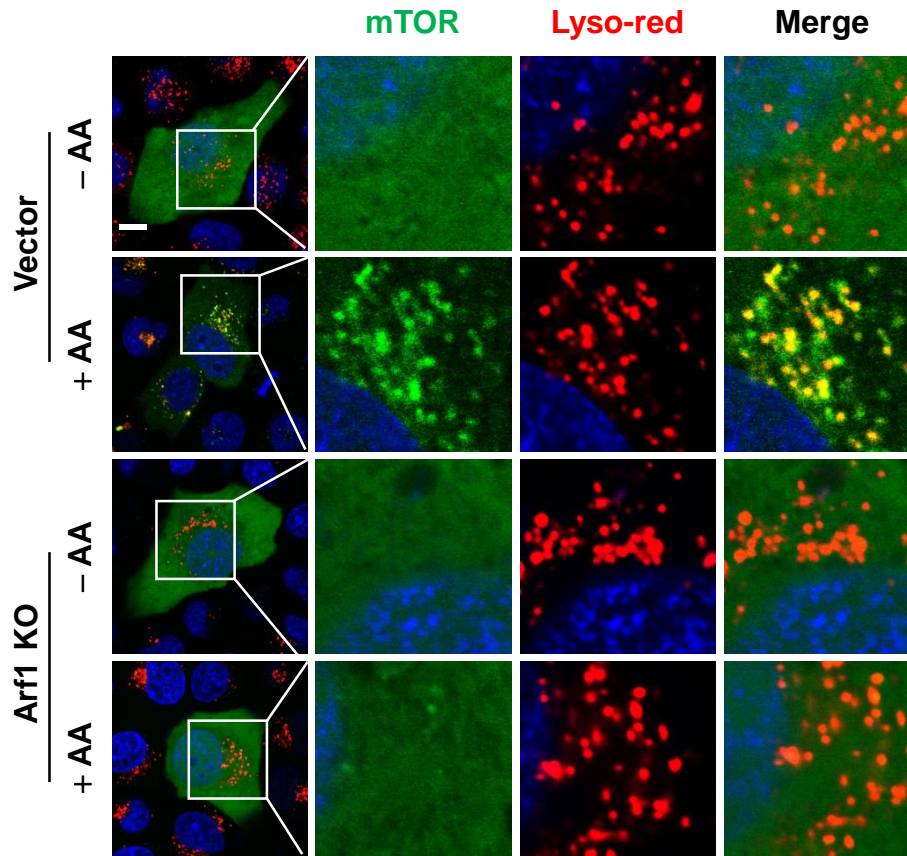

**Appendix Figure S3. Arf1 deficiency inhibited mTORC1 activation and lysosomal association.** Confocal imaging analysis depicting the co-localization of mTOR with lysosomes in C2C12-Vector and Arf1 KO cells transiently expressing YFP-mTOR and stained with LysoTracker Red under starvation and in response to AA stimulation. Scale bar, 10  $\mu$ m.

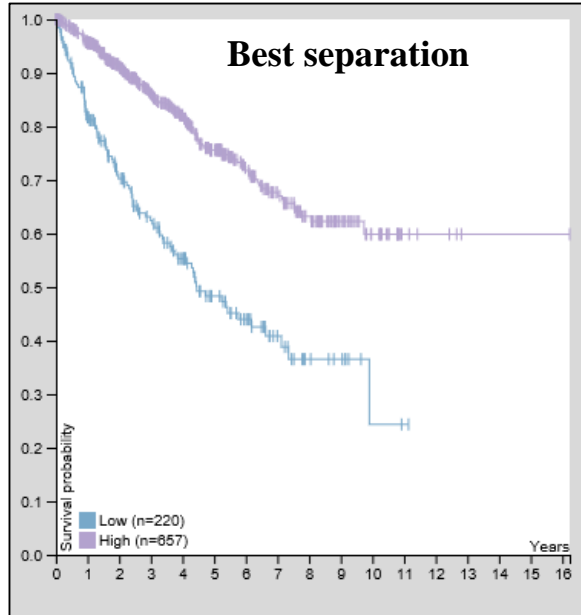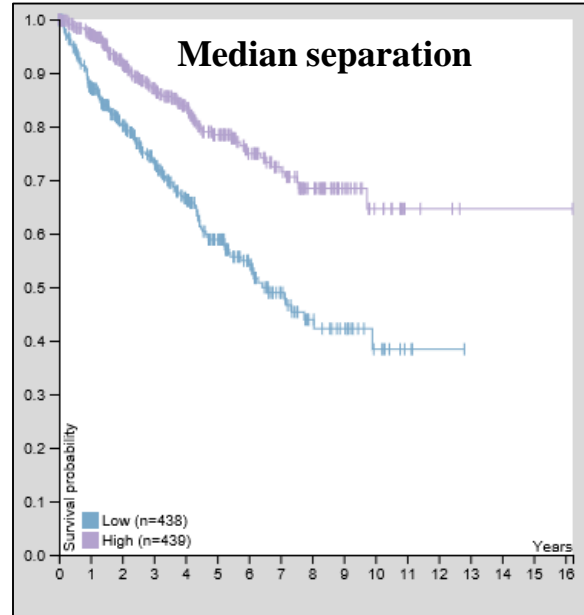

| Expression cutoff                                                                                                                       | 1.4 FPKM                            | 2.2 FPKM |
|-----------------------------------------------------------------------------------------------------------------------------------------|-------------------------------------|----------|
| 5-year survival high 5-year survival for patients with higher expression than the expression cutoff.                                    | 76%                                 | 78%      |
| 5-year survival low 5-year survival for patients with lower expression than the expression cutoff.                                      | 48%                                 | 59%      |
| Log-rank P value for Kaplan-Meier plot showing results from analysis of correlation between mRNA expression level and patient survival. | 4.22e-15<br>(Prognostic, favorable) | 7.58e-10 |

**Appendix Figure S4. The expression level of Aster-C is negatively correlated with the prognosis of human renal cancer**

Data obtained from:

<https://www.proteinatlas.org/ENSG00000178075-GRAMD1C/pathology>
