# Supplementary material
Source: PubMed Central journal article supplement (PMC7507422)
Supplement: EMBR-21-e49898-s002.pdf [file EMBR-21-e49898-s002.pdf]

## Expanded View Figures

### Figure EV1. Aster-C deficiency increases cell size and proliferation.

- A Schematic representation of Aster-C protein domains.
  - B, C Confocal imaging analysis depicting C2C12-vector control (Vector, B) and Aster-C KO (C) cells stained with CellMask™ Deep Red plasma membrane dye for cell size analysis. Cells were stained and analyzed 4 h after seeding. Scale bars, 50  $\mu$ m.
  - D Quantification of cell size from B and C ( $n = 100$  cells per group). Data are represented as mean  $\pm$  SD. \*\*\* $P < 0.001$  by Student's  $t$  test.
  - E Cell proliferation rate analysis of vector and Aster-C KO C2C12 cells. Data are represented as mean  $\pm$  SD ( $n = 3$  biological replicates). \* $P < 0.05$  and \*\* $P < 0.01$  by Student's  $t$  test.
  - F Real-time RT-PCR analysis of Aster-C gene expression in vector control and Aster-C KO C2C12 cells. Data are represented as mean  $\pm$  SD ( $n = 3$  biological replicates). \*\*\* $P < 0.001$  by Student's  $t$  test.
  - G Western blot analysis of phosphorylation of Akt in Vector and Aster-C KO C2C12 cells.
  - H Western blot analysis of mTORC1 activity in HEK293T cells transiently over-expressing Myc tagged Aster-C in complete medium (CM), or in response to nutrient starvation and AA and/or insulin stimulation.
- Data information: Data are representative of at least three independent experiments.

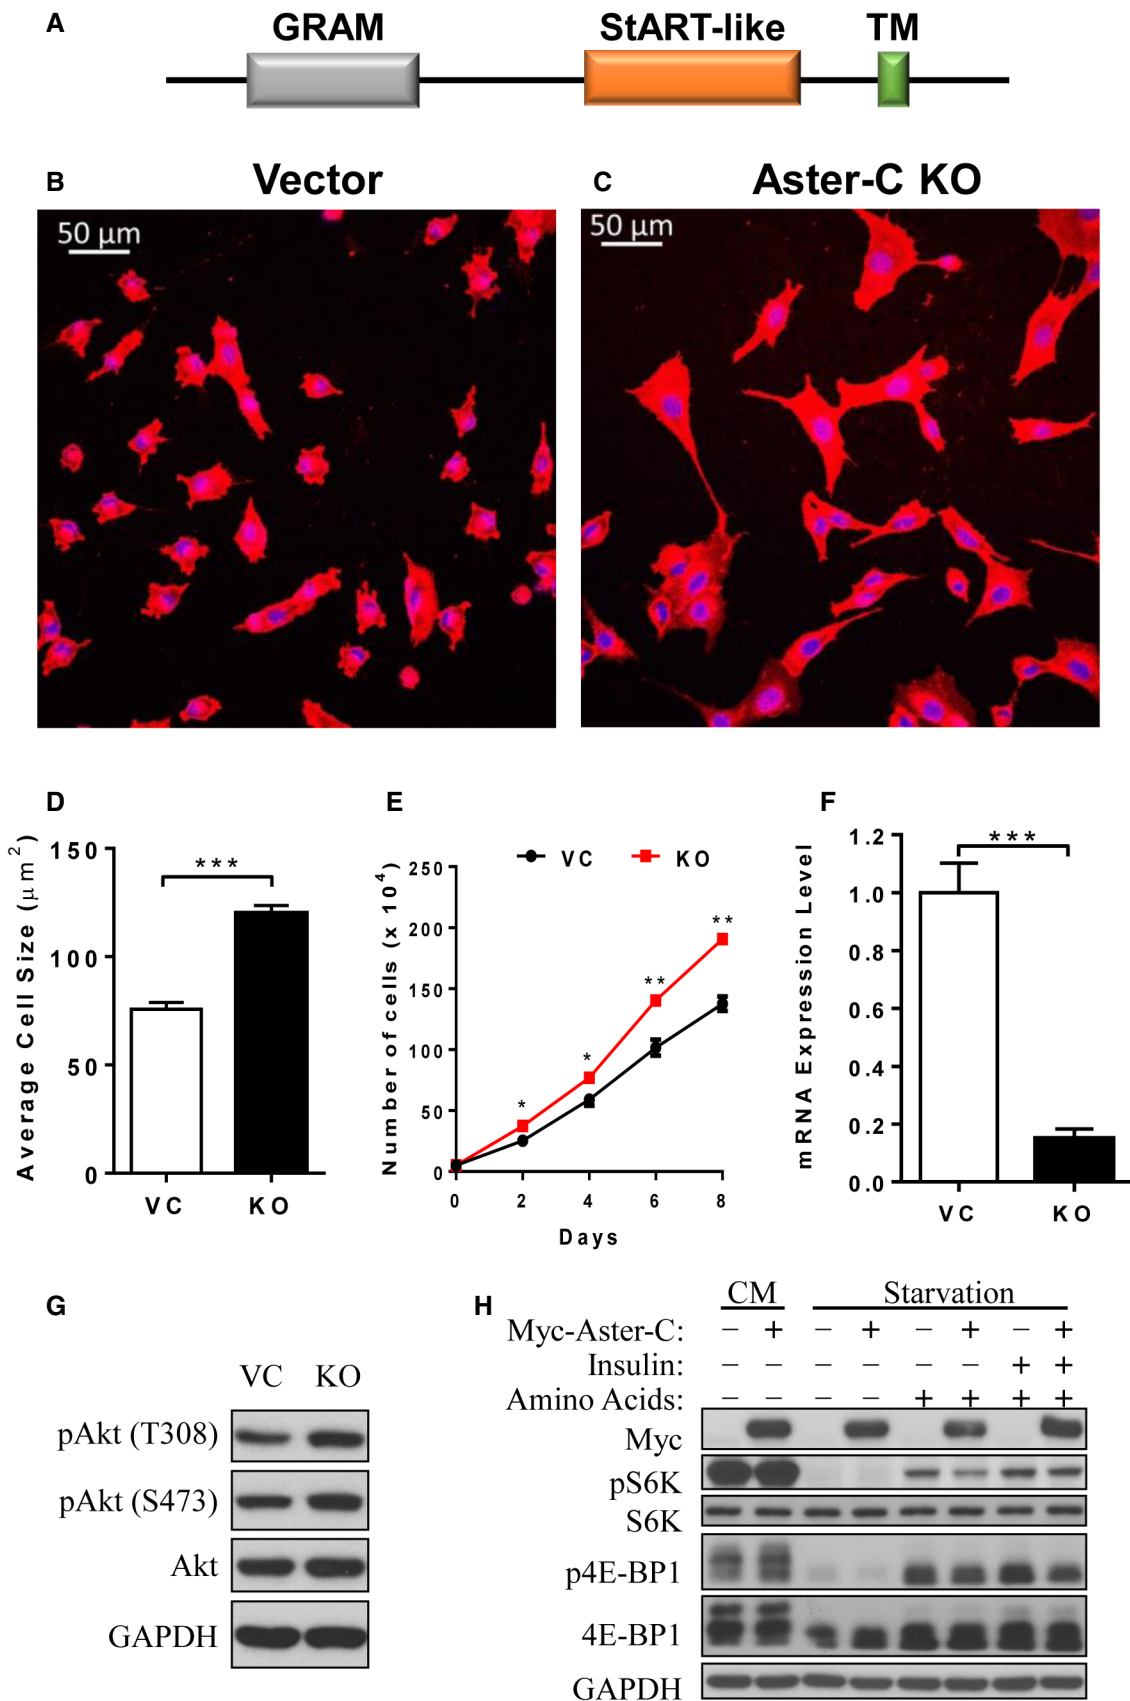

Figure EV1.

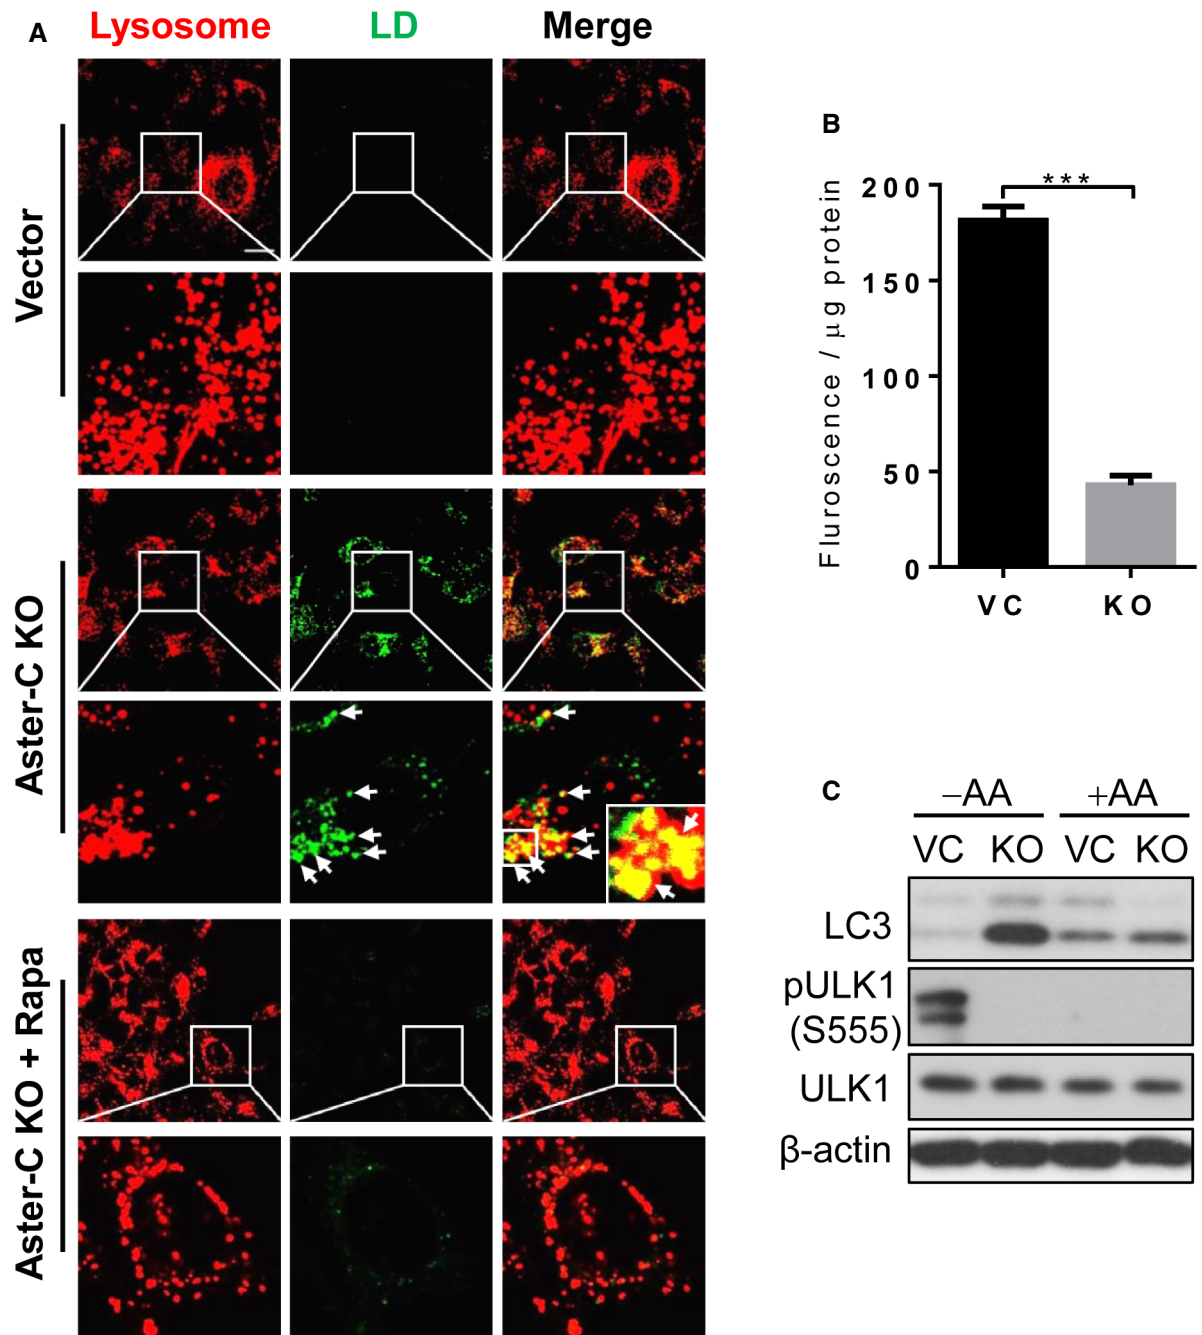

**Figure EV2. Aster-C deficiency causes lipid droplets accumulation in lysosomes.**

**A** Confocal image analysis of lipid droplets in C2C12-vector control (Vector) and Aster-C KO cells stained with LysoTracker Red under nutrient starvation in the presence or absence of rapamycin (Rapa) treatment. Lipid droplets were stained using BODIPY™ 650/665-X according to the manufacturer's instruction. Arrows highlight the accumulation of lipid droplets in the lysosomes. Scale bar, 20  $\mu\text{m}$ .

**B** Lysosomal proteolytic degradation assay in C2C12-Vector and Aster-C KO cells under nutrient starvation using DQ-red-BSA as described in Materials and Methods. Data are represented as mean  $\pm$  SD ( $n = 3$  biological replicates). \*\*\* $P < 0.001$  by Student's  $t$  test.

**C** Western blot analysis of LC3 and phosphorylated ULK1 (S555) level in C2C12-Vector and Aster-C KO cells in response to nutrient starvation and AA stimulation.

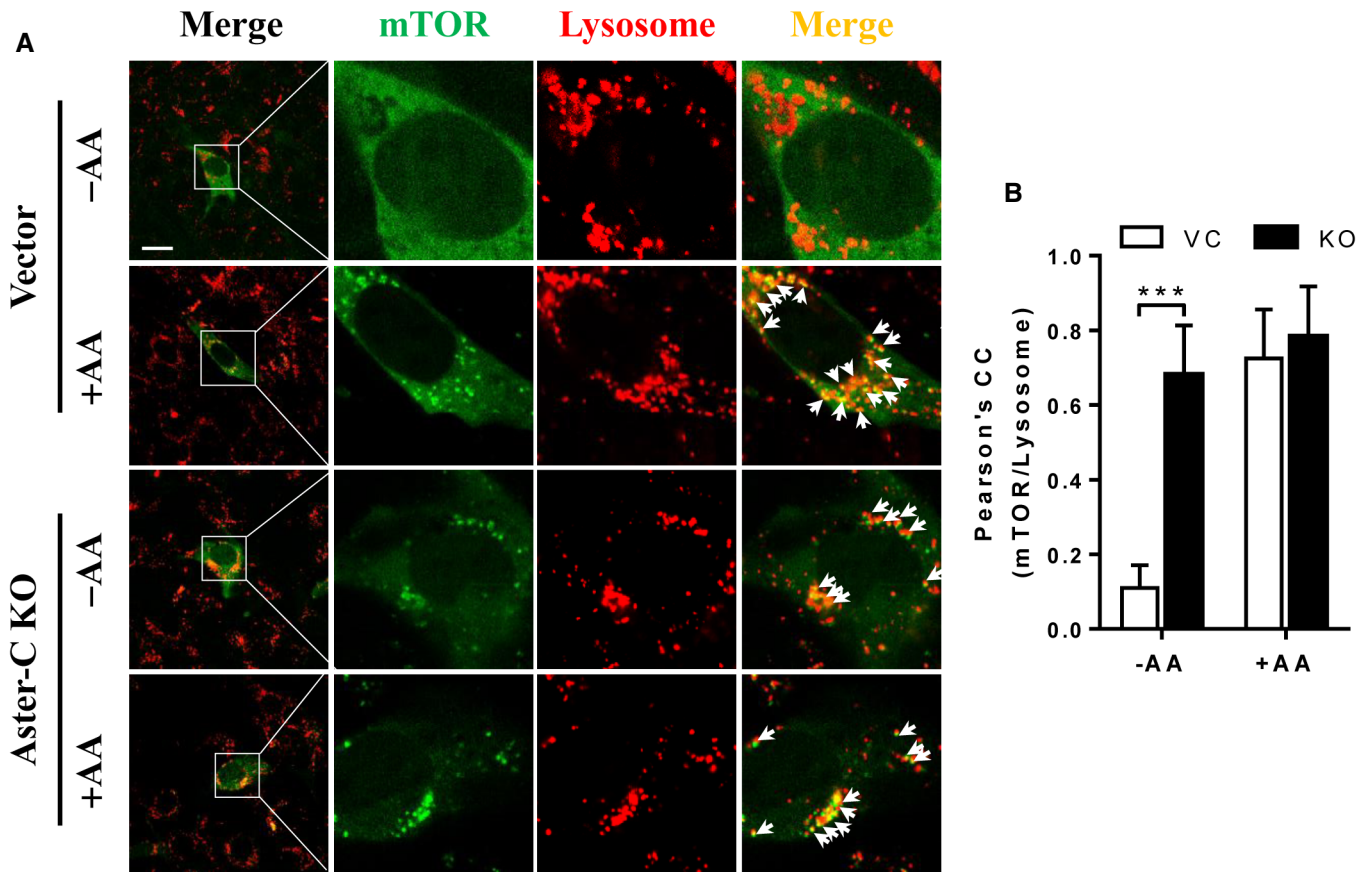

**Figure EV3. Aster-C deficiency renders mTORC1 constitutively activated in live C2C12 cells.**

A Confocal imaging analysis depicting YFP-mTOR (green) and lysosomes (red) in live C2C12 Aster-C KO and Vector cells transiently transfected with YFP-mTOR under nutrient starvation (–AA) and in response to AA stimulation (+AA). Arrows highlight co-localization of mTOR with lysosomes. Scale bar, 20  $\mu$ m.

B Statistical analysis of the Pearson's correlation coefficient of mTOR and lysosomes in A ( $n = 10$ –15 cells per group). Data are represented as mean  $\pm$  SD. \*\*\* $P < 0.001$  by one-way ANOVA.

Data information: Data are representative of at least two independent experiments.

**Figure EV4. Aster-C prevents lysosomal association of TSC2 during nutrient starvation.**

A Immunostaining of endogenous TSC2 and LAMP1 in C2C12-Vector and Aster-C KO cells under nutrient starvation (–AA) and in response to AA stimulation (+AA). Arrows highlight co-localization of TSC2 with LAMP1. Scale bar, 10  $\mu$ m.

B Statistical analysis of the Pearson's correlation coefficient of TSC2 and LAMP1 in A ( $n = 10$ –15 cells per group). Data are represented as mean  $\pm$  SD. \*\*\* $P < 0.001$  by one-way ANOVA.

C Western blot analysis of phosphorylation of TSC2 in C2C12-Vector and Aster-C KO cells under starvation and amino acid re-stimulation for 10 or 30 min.

D Co-IP analysis of the interaction of Aster-C with TSC2 in HEK293T cells transiently expressing FLAG-Aster-C in response to starvation and AA stimulation. FLAG-DEPDC5 was used as a negative control. Anti-FLAG antibody was used for immunoprecipitation. Black arrow indicates the FLAG-tagged Aster-C protein.

E Co-IP analysis of the interaction of Aster-C with TSC2 in HEK293T cells transiently expressing FLAG-Aster-C in response to starvation and AA stimulation. Anti-TSC2 antibody was used for immunoprecipitation.

Data information: Data are representative of at least two independent experiments.



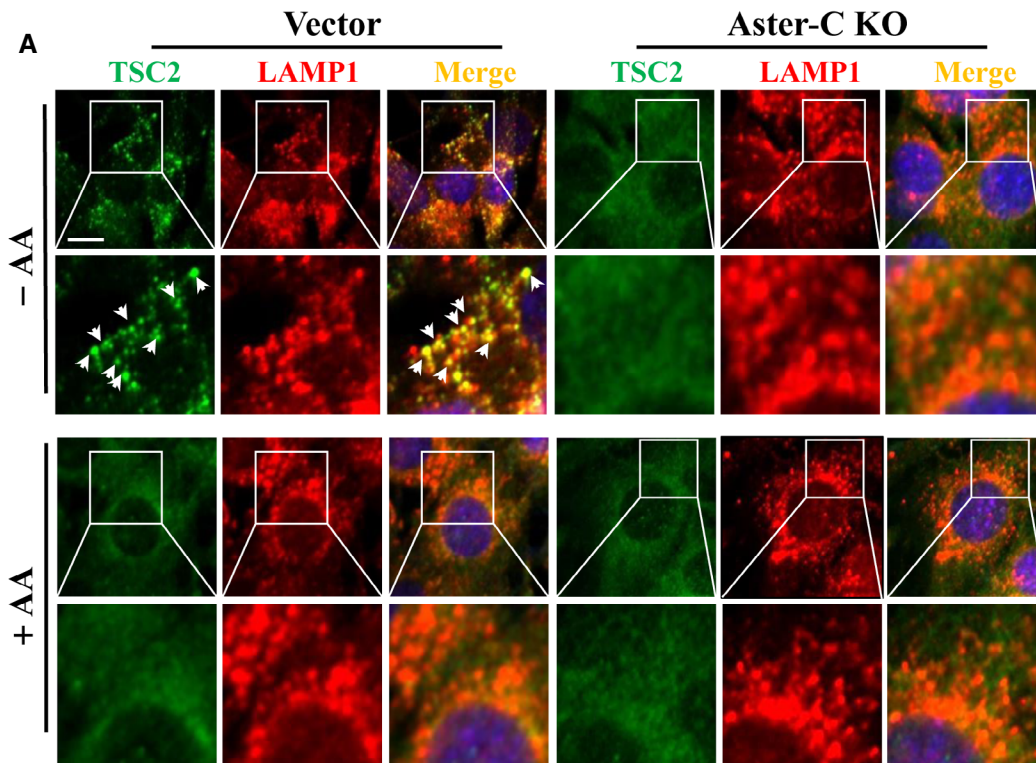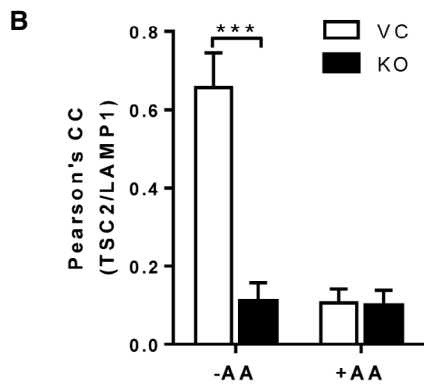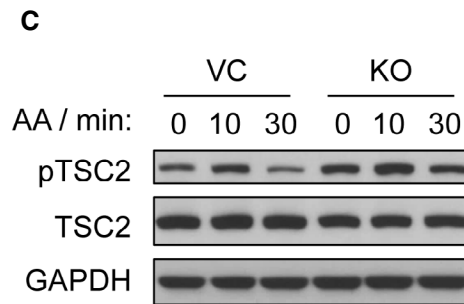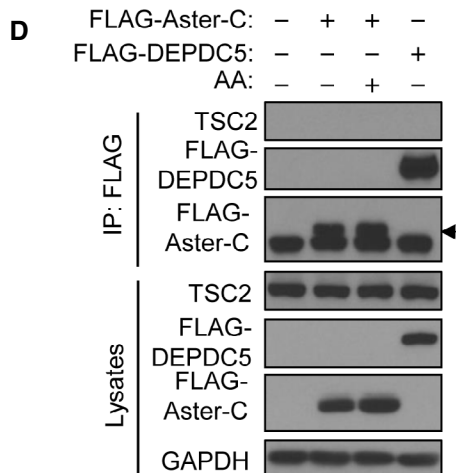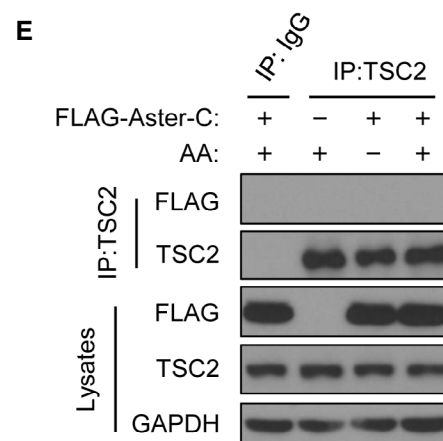

Figure EV4.

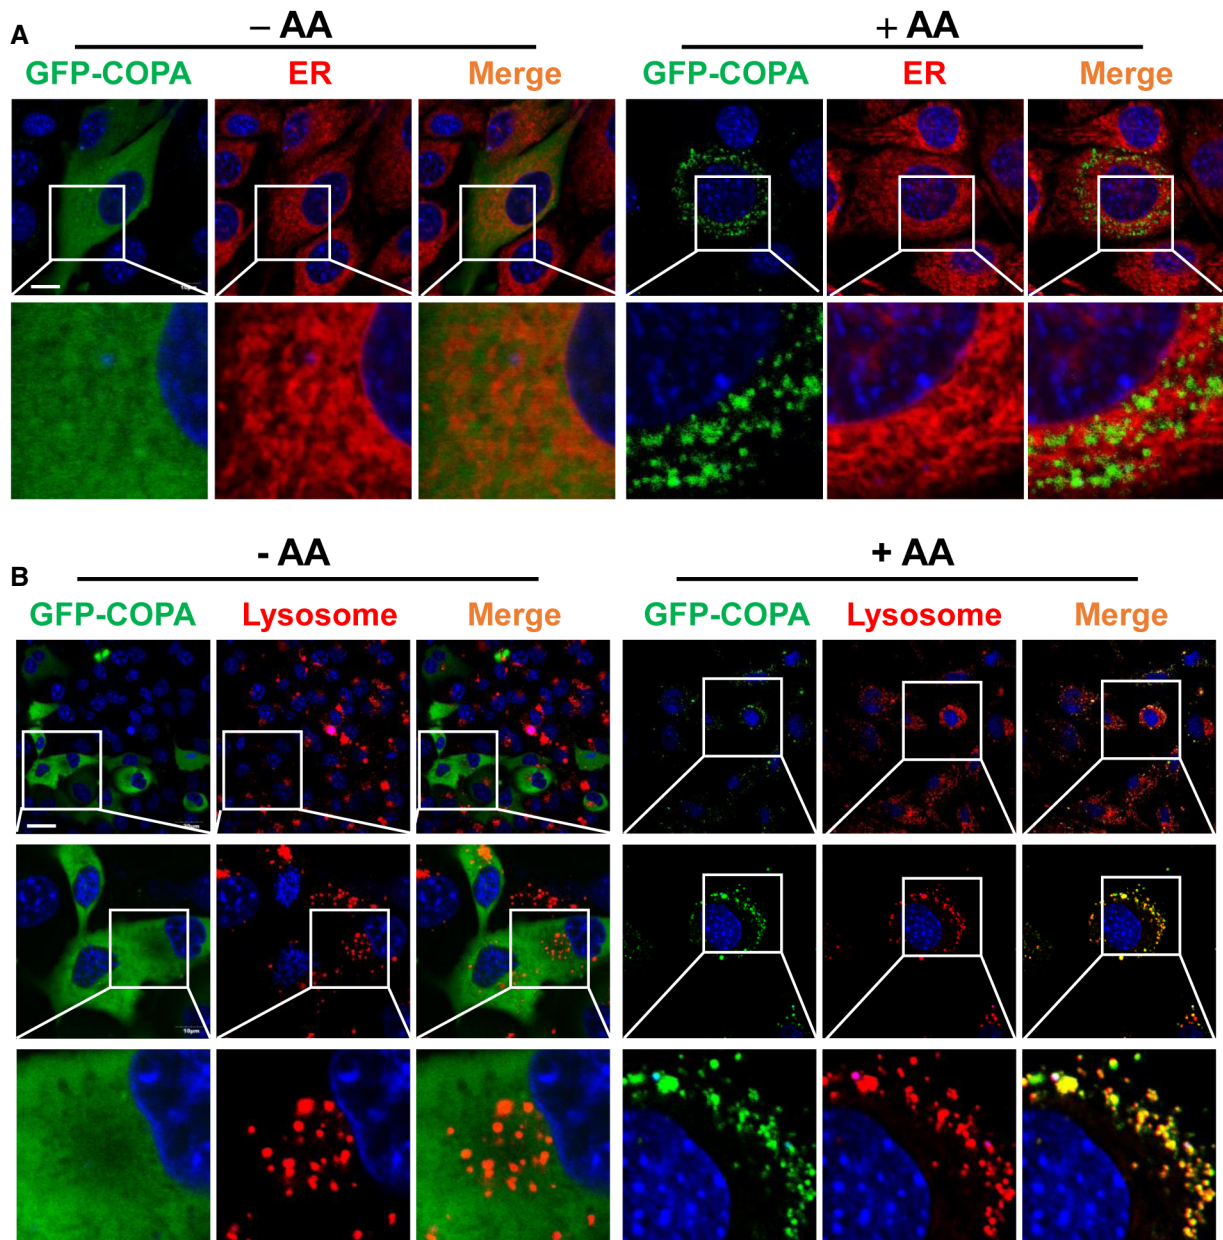

**Figure EV5. Amino acids stimulate the biogenesis and lysosomal association of COP I vesicles.**

**A** Confocal image analysis the co-localization of COPA with the ER in live C2C12 cells transiently expressing GFP-COPA and stained ER with ER-Tracker Red under starvation and in response to AA stimulation. Scale bar, 10  $\mu$ m.

**B** Confocal image analysis co-localization of COPA with lysosomes in live C2C12 cells transiently expressing GFP-COPA and stained with LysoTracker Red under starvation and in response to AA stimulation. Scale bar, 30  $\mu$ m.

Data information: Data are representative of at least two independent experiments.
